# Supplementary material for: Metformin Attenuates ROS via FOXO3 Activation in Immune Cells
Source: PubMed Central journal article supplement (PMC8089390; doi:10.3389/fimmu.2021.581799), 2021-04-19
Supplement: DataSheet_1.pdf [file DataSheet_1.pdf]

## *Supplementary Material*

### **1 Supplementary Method**

#### **Analysis of *MAP1LC3A* gene expression**

Total RNA was extracted (RNeasy® Mini Kit QIAGEN®) according to the manufacturer's instructions. cDNA was prepared by reverse transcription and real-time PCR was performed using TaqMan® Universal PCR Master Mix (Applied Biosystems) and TaqMan® Gene Expression Assays for *MAP1LC3A* and 18S rRNA (Applied Biosystems). Analyses was performed with the ABI7200 and software Step One Plus as absolute quantification according to manufacturer's instruction. Relative expression was analyzed using the  $\Delta\Delta CT$  method and normalized against 18S rRNA.

Univariate analysis was performed using Wilcoxon matched-pairs signed rank test (Wilcoxon test). P values were calculated in a one-tailed manner.

## 2 Supplementary Figures

### 2.1 Supplementary Figure 1

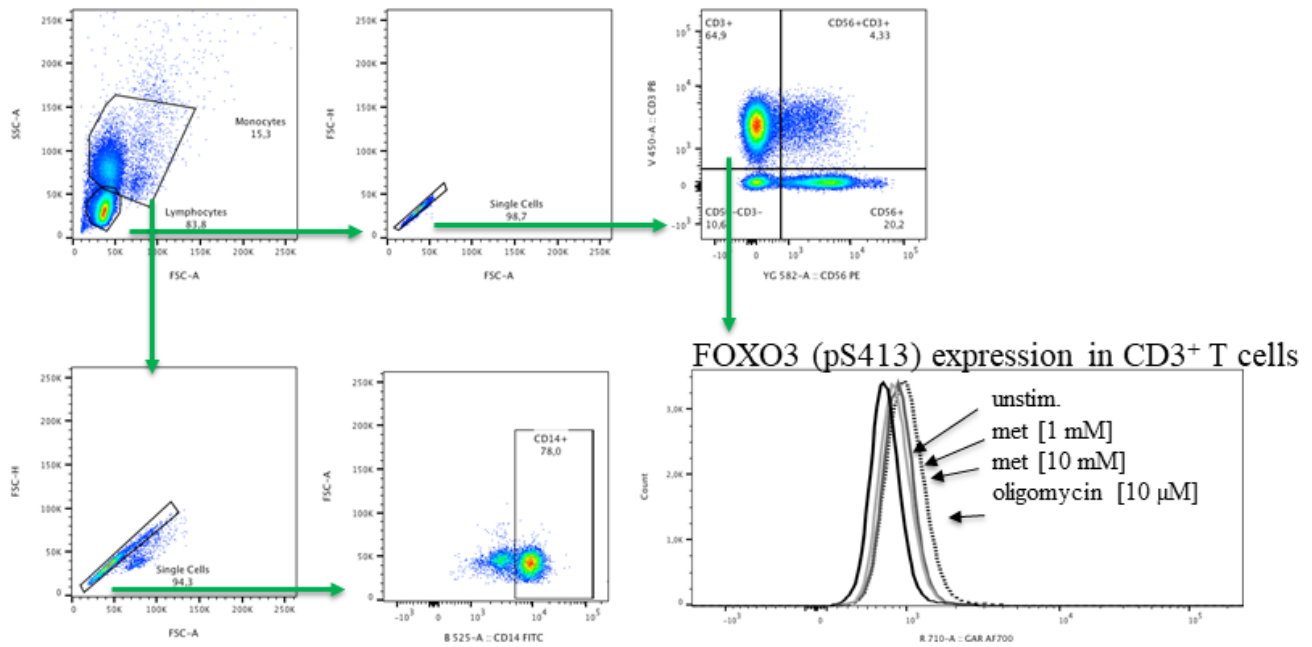

**Figure S1: Representative gating strategy** along with FOXO3 (pS413) expression in CD3<sup>+</sup> T cells. Histogram is showing FOXO3 (pS413) expression after 30 min of stimulation with metformin [1mM, 10 mM] and oligomycin [10 μM].

## 2.2 Supplementary Figure 2

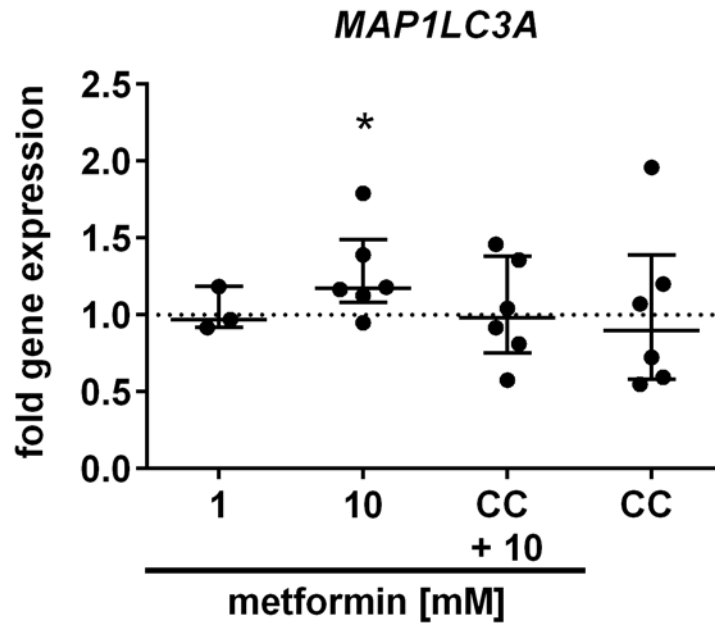

**Figure S2: Gene expression of autophagic marker LC3 is induced by metformin.** (A) RNA expression analysis of the gene *MAP1LC3A* after 3 h incubation with different dosages of metformin alone or in combination with Compound C (CC) [10  $\mu$ M] (n=3-6). Gene expression was normalized to 18S rRNA and is depicted as fold induction to unstimulated control. Median with interquartile range is shown and significance was evaluated using a one-tailed Wilcoxon test. \*P  $\leq$  0.05

### 3 Supplementary Table

| Nr. | rs12212067                      | rs2802992                        | rs12206094                      |
|-----|---------------------------------|----------------------------------|---------------------------------|
| 1   | T/T                             | G/G                              | C/C                             |
| 2   | T/T                             | G/T                              | C/T                             |
| 3   | T/T                             | G/T                              | C/T                             |
| 4   | T/T                             | T/T                              | C/C                             |
| 5   | T/T                             | T/T                              | C/C                             |
| 6   | T/T                             | G/G                              | C/T                             |
| 7   | T/T                             | G/T                              | C/C                             |
| 8   | G/T                             | G/T                              | C/T                             |
| 9   | G/T                             | G/G                              | T/T                             |
| 10  | T/T                             | G/T                              | C/T                             |
| 11  | G/T                             | G/T                              | C/T                             |
| 12  | T/T                             | G/T                              | C/T                             |
| 13  | T/T                             | G/T                              | C/T                             |
| 14  | G/G                             | G/G                              | C/T                             |
| 15  | T/T                             | G/T                              | C/T                             |
| 16  | T/T                             | T/T                              | C/C                             |
| 17  | T/T                             | G/T                              | C/T                             |
| 18  | G/T                             | G/G                              | T/T                             |
| 19  | T/T                             | T/T                              | C/C                             |
| 20  | G/T                             | G/T                              | C/C                             |
| 21  | T/T                             | G/T                              | C/T                             |
| 22  | G/T                             | G/T                              | C/T                             |
| 23  | T/T                             | T/T                              | C/C                             |
| 24  | T/T                             | T/T                              | C/C                             |
| 25  | G/T                             | G/G                              | C/T                             |
| 26  | G/T                             | G/T                              | C/C                             |
| 27  | T/T                             | G/T                              | C/T                             |
| 28  | T/T                             | G/T                              | C/C                             |
| 29  | T/T                             | G/T                              | C/T                             |
| 30  | T/T                             | G/T                              | C/C                             |
| 31  | T/T                             | G/G                              | C/T                             |
| 32  | G/T                             | G/T                              | C/T                             |
| 33  | T/T                             | T/T                              | C/C                             |
| 34  | T/T                             | T/T                              | C/C                             |
| 35  | T/T                             | T/T                              | C/C                             |
| 36  | G/T                             | G/G                              | T/T                             |
| 37  | T/T                             | G/G                              | C/T                             |
| 38  | T/T                             | G/T                              | C/T                             |
| 39  | G/T                             | G/T                              | C/T                             |
| 40  | T/T                             | G/G                              | T/T                             |
| 41  | T/T                             | T/T                              | C/C                             |
| 42  | T/T                             | T/T                              | C/C                             |
|     | T/T n=30<br>G/T n=11<br>G/G n=1 | T/T n=11<br>G/T n=21<br>G/G n=10 | C/C n=17<br>C/T n=21<br>T/T n=4 |
